1 **Big data screening identifies 110 complex traits causally**  
2 **associated with obesity**

3

4 **Running Title:** Causal architecture of obesity

5

6 Luis M. García-Marín<sup>1</sup>, Adrián I. Campos<sup>1,2</sup>, Pik-Fang Kho<sup>1,3</sup>, Nicholas G. Martin<sup>1</sup>,  
7 Gabriel Cuéllar-Partida<sup>2,\*,†</sup> and Miguel E. Rentería<sup>1,2,3,\*</sup>

8

9 1. Department of Genetics and Computational Biology, QIMR Berghofer Medical  
10 Research Institute, Brisbane QLD Australia

11 2. Faculty of Medicine, The University of Queensland, Brisbane QLD Australia

12 3. School of Biomedical Sciences, Faculty of Health, Queensland University of  
13 Technology, Brisbane, Queensland, Australia.

14 \* **Correspondence:** Miguel E. Rentería ([miguel.renteria@qimrberghofer.edu.au](mailto:miguel.renteria@qimrberghofer.edu.au)) and  
15 Gabriel Cuellar-Partida ([g.cuellarpartida@uq.edu.au](mailto:g.cuellarpartida@uq.edu.au))

16 † Current address: 23andMe, Inc., Sunnyvale, California, USA

17

18 **DISCLOSURE STATEMENT**

19 GC-P contributed to this study while employed at The University of Queensland. He  
20 is now an employee of 23andMe Inc. and he may hold stock or stock options. All  
21 other authors declare having no conflicts of interest.

## 22 **ABSTRACT**

23 **Background/Objectives:** Obesity has become a serious public health concern  
24 worldwide due to the rapid increase in its prevalence and its multiple negative health  
25 consequences. Here we sought to identify causal relationships between obesity and  
26 other complex traits and conditions using a data-driven hypothesis-free approach  
27 that relies on genetic data to infer causal associations.

28 **Subjects/Methods:** We leveraged available summary-based genetic data from  
29 genome-wide association studies on 1 498 phenotypes and applied the latent causal  
30 variable method (LCV) between obesity and all traits.

31 **Results:** We identified 110 traits with significant causal associations with obesity.  
32 Results show obesity influencing 26 phenotypes associated with cardiovascular  
33 diseases, 22 anthropometric measurements, 9 with the musculoskeletal system, 9  
34 with behavioural or lifestyle factors including *loneliness or isolation*, 6 with respiratory  
35 diseases, 5 with body bioelectric impedances, 4 with psychiatric phenotypes, 4 with  
36 the nervous system, 4 with disabilities or long-standing illness, 3 with the  
37 gastrointestinal system, 3 with use of analgesics, 2 with metabolic diseases such as  
38 *diabetes*, 1 with inflammatory response and 1 with the neurodevelopmental disorder  
39 *ADHD*, among others.

40 **Conclusions:** Our results indicate that obesity is primarily the cause, not the  
41 consequence of other underlying traits or comorbid diseases. The wide array of  
42 causally associated phenotypes provides an overview of the metabolic,  
43 physiological, and neuropsychiatric impact of obesity.

## 44 INTRODUCTION

45 Obesity is a complex, multifactorial and preventable disease in which an imbalance  
46 between daily caloric energy intake and expenditure leads to unwanted and atypical  
47 accumulation of fat or adipose tissue, which in turn results in the impairment of  
48 human health.[1–3] Obesity is the second most common cause of preventable death  
49 after smoking,[1,4–6] making it an essential target of public health interventions.  
50 Globally, its prevalence has increased by 27.5% for adults and 47.1% for children in  
51 the last three decades,[6,7] affecting over 500 million adults.[1]

52

53 Obesity is typically defined according to body mass index (BMI), which is estimated  
54 as the ratio between weight in kilograms and height in meters squared.[1,8]  
55 Typically, an individual with a BMI higher than 30 is considered obese.[1,8] The BMI-  
56 based classification includes underweight (BMI < 18.5), normal range (18.5 < BMI <  
57 24.9), overweight (25 < BMI < 29.9), obese class I (30 < BMI < 34.9), obese class II  
58 (35 < BMI < 39.9) and obese class III individuals (BMI > 40). [1,8]

59

60 Genetic epidemiological studies have made considerable advances in the  
61 understanding of the genetic propensity to obesity. Genome-wide association studies  
62 (GWAS) have identified ~300 genomic loci associated with an obesity measure[9]  
63 and genetic overlap with other anthropometric measurements, coronary artery  
64 disease, blood pressure and type 2 diabetes, among others has been reported.[10] A  
65 genetic correlation between two traits could be explained by horizontal pleiotropy  
66 (i.e. genetic variants have a direct effect on both traits), or by vertical pleiotropy (i.e.  
67 the effect of a genetic variant on a trait is mediated by its effect on another trait).  
68 Horizontal pleiotropy represents a challenge for statistical methods seeking to

69 determine causality between two traits. The Latent Causal Variable (LCV) is a  
70 recently developed statistical approach that was developed to investigate whether a  
71 genetic correlation between traits is explained by genetic causation or by horizontal  
72 pleiotropic effects (see *Methods*).[11–13]

73

74 Understanding the extent to which obesity is causally associated with other  
75 conditions is a fundamental question in obesity research.[11–13] Here we apply a *big*  
76 *data* approach to identify causal associations between obesity and other  
77 phenotypes. Specifically, we apply the LCV method to perform a hypothesis-free  
78 phenome-wide screening to the extensive collection of phenotypes with GWAS  
79 summary data ( $N = 1\,498$ ) compiled in the Complex Trait Genetics Virtual Lab (CTG-  
80 VL).

81

## 82 **MATERIALS / SUBJECTS AND METHODS**

### 83 **Data**

84 The present study used summary statistics from GWAS for obesity and 1 498 other  
85 phenotypes. Summary statistics summarise relevant parameters such as allele  
86 frequency, effect size, standard error and the p-value of genetic variants tested on  
87 the trait of interest. Several published GWAS have made available their summary  
88 statistics to the scientific community to enable researchers to advance understanding  
89 of the genetic components of several phenotypes. The CTG-VL  
90 (<https://genoma.io/>)[14] has compiled a set of over 1 610 GWAS summary statistics  
91 including those from the UK Biobank released by Neale's Lab ([www.nealelab.is/uk-](http://www.nealelab.is/uk-biobank/)  
92 [biobank/](http://www.nealelab.is/uk-biobank/))[15] and from GWAS consortia. For this study, we only used GWAS derived

93 from European populations to avoid potential biases due to population differences in  
94 linkage-disequilibrium and allele frequencies.

95

### 96 **Obesity dataset**

97 The obesity GWAS summary statistics used here correspond to a sample ( $N=361$   
98  $194$ ) of European ancestry from the second wave of GWAS results released by  
99 Neale's Lab (ICD10 code E66)[14,15] available in the CTG-VL. Obesity GWAS  
100 summary statistics were adjusted for age, age<sup>2</sup>, inferred\_sex, age \* inferred\_sex,  
101 age<sup>2</sup> \* inferred\_sex, and 20 genetic ancestry principal components.[14,15]

102

### 103 **LCV analysis**

104 Genetic causal proportion (GCP) between the obesity GWAS and 1 498 GWAS was  
105 estimated using the phenome-wide LCV pipeline implemented in CTG-VL as  
106 described previously (see Haworth *et al.* 2019[13] and García-Marín *et al.* 2020[12]  
107 for details)[12,13]. The LCV method estimates GCP by assuming a latent variable  $L$   
108 that mediates the genetic correlation between two traits, which is assumed to be the  
109 causal component mediating the genetic correlation between the phenotypes (see  
110 O'Connor & Price[11] for details).[11–13] The GCP ranges from -1 (full genetic  
111 causality of Trait 2 on Trait 1) to 1 (full genetic causality of Trait 1 in Trait 2), in which  
112 a GCP equal to zero implies the detection of horizontal pleiotropy instead of genetic  
113 causality.[11–13] Benjamini-Hochberg's False Discovery Rate (FDR < 5%) was  
114 used to account for multiple testing.

115

## 116 **RESULTS**

117 We conducted a phenome-wide LCV analysis between obesity and 1 498 other  
118 phenotypes to estimate the genetic correlation and GCP. We identified 267 genetic  
119 correlations with obesity at  $FDR < 5\%$ . Of those, 105 were inferred to be causally  
120 associated ( $|GCP| > 0.6$ ;  $FDR < 5\%$ ; **Supplementary File 1**) and five showed  
121 suggestive evidence of a causal association ( $|GCP| < 0.6$ ;  $FDR < 5\%$ ;  
122 **Supplementary File 1**). Putative outcomes of obesity included cardiovascular  
123 diseases, anthropometric measurements, the health of the musculoskeletal system,  
124 behavioural or lifestyle factors, respiratory diseases, body bioelectric impedances,  
125 psychiatric disorders, diseases of the nervous system, disabilities or long-standing  
126 illness, health of the gastrointestinal system, use of analgesics, metabolic diseases,  
127 inflammatory response and neurodevelopmental disorders, among others (**Table 1**  
128 and **Figure 1**).

129

130 Our results show 26 cardiovascular phenotypes as consequences of obesity. For  
131 instance, we identified obesity increased the risk of self-reports on *hypertension* and  
132 *heart attack*. Conditions diagnosed by a doctor such as *high blood pressure*, *heart*  
133 *attack* and *angina problems* were also found to be at an increased risk due to  
134 obesity. A similar pattern was observed for *chronic ischaemic heart disease*  
135 allocated in the International Classification of Diseases (ICD10) and *diastolic blood*  
136 *pressure*. In contrast, obesity was found to influence a decline in high-density  
137 lipoprotein (*HDL cholesterol*) (**Figure 1** and **Table 2**).

138

139 Our results show 22 causal associations between obesity and anthropometric  
140 measurements. Of those, 18 were identified to be increases in anthropometric  
141 measurements such as *fat percentages* throughout the body and *ankle spacing*

142 *width*. In contrast, a decline in *height* and *handgrip strength* were found to be  
143 causally influenced by obesity. Similarly, we found evidence of obesity influencing a  
144 decrease in five body bioelectrical impedance measures, including in both arms and  
145 legs.

146

147 An increased risk for eight phenotypes involving *diseases of the musculoskeletal and*  
148 *connective tissue* was observed (**Table 2**). Pain-related phenotypes such as *knee*  
149 *and hip pain in the last month* along with *self-reported osteoarthritis, arthrosis and*  
150 *gonarthrosis (ICD10)*, were found to be causally influenced by obesity. In contrast,  
151 *leg pain in calves* was identified to increase the risk of obesity.

152

153 Six inferred causal relationships were observed between obesity and respiratory-  
154 related phenotypes. For instance, obesity increased risk of *shortness of breath* and  
155 *whistling in the chest* were observed. Consistently, obesity was found to causally  
156 influence the decline of *forced vital capacity (FVC)* and *forced expiratory volume in*  
157 *one second (FEV1)* (**Figure 1** and **Table 2**).

158

159 Obesity was identified as a risk factor for four psychiatric-related traits, including  
160 *gaining weight during the worst period of depression* (**Figure 1** and **Table 2**). Also,  
161 obesity was observed to increase risk of irritability through traits such as *ever having*  
162 *a period of extreme irritability*, *experiencing manifestations of mania or irritability* and  
163 *ever highly irritable for two days*. Also, obesity increase in the behavioural trait  
164 *loneliness or isolation* was found to be caused by obesity (**Figure 1** and **Table 2**).

165

166 Obesity was causally associated with higher risk of four *diseases of the nervous*  
167 *system (Table 2)* including *mononeuropathies of upper limb (ICD10)*, *carpal tunnel*  
168 *syndrome* and *nerve, nerve root and plexus disorders (Figure 1)*.

169

170 Three phenotypes related to the gastrointestinal system, including *diverticular*  
171 *disease of the intestine (ICD10)* and *self-reported gastro-oesophageal reflux* were  
172 identified as causally associated with obesity (**Table 2**).

173

174 *Diabetes*, both *self-reported* and *diagnosed by a doctor*, showed evidence of being  
175 at an increased risk due to obesity. Also, obesity was also found to pose a causal  
176 effect on *high leukocyte levels* and to increase the risk for *attention-deficit /*  
177 *hyperactivity disorder (ADHD) (Figure 1 and Table 2)*.

178

## 179 **DISCUSSION**

180 Although previous research has made extensive efforts to describe how obesity and  
181 metabolic syndrome influence several body systems, their relationship with  
182 inflammatory response, hypertension, cardiovascular disease, neurodevelopmental  
183 disorders and the musculoskeletal and nervous system has not been fully elucidated.  
184 Leukocytes are white blood cells involved in both local and general inflammatory  
185 response.[16,17] Further, it has been reported that obesity increases adipose tissue  
186 dysfunction, leading to a pro-inflammatory state, which in turn can result in vascular  
187 dysfunction impairing endothelium vasodilation with an impact on hypertension and  
188 affecting the responsiveness of the insulin-vasodilator mechanism.[18,19] Also,  
189 obesity is considered the main cause of metabolic syndrome components such as  
190 high blood pressure and triglycerides, while the increased risk of diabetes is



191 attributed to a decrease in insulin secretion as a consequence of obesity-related  
192 effects.[9] In this study, genetic obesity was causally associated with increased  
193 *leukocyte count, self-reported hypertension, high blood pressure and diabetes*  
194 *diagnosed by a doctor.*

195

196 Obesity and metabolic syndrome are major risk factors for cardiovascular  
197 disease.[1,9,19] In the present study, several cardiovascular diseases were found to  
198 be causally influenced by obesity. Specifically, our results indicate obesity increases  
199 risk of *major coronary heart disease events, heart attacks, myocardial infarctions,*  
200 *chronic ischaemic heart disease (ICD10) and angina problems.* It has been shown  
201 that inflammation is a significant risk factor for heart disease events.[20,21] Thus, our  
202 findings support the hypothesis in which the relationship between obesity and  
203 cardiovascular diseases is mediated by inflammation from high leukocyte levels due  
204 to obesity, leading to high *blood pressure and hypertension,* which are known risk  
205 factors for cardiovascular disease.

206

207 Obesity influences the increase in the mechanical load across weight-bearing joints,  
208 which has been associated with musculoskeletal deterioration and neuropathic  
209 pain.[22,23] Further, previous studies have suggested that an increase in fat mass  
210 may result in a decrease in bone mass.[23] Our findings uncovered inferred causal  
211 associations between obesity and musculoskeletal pain and diseases such as  
212 *osteoarthritis.* A similar pattern was observed for *diseases of the nervous system,*  
213 including *mononeuropathies and nerve, nerve root and plexus disorders.*  
214 Consistently, obesity was found to increase the *use of analgesics* such as *Aspirin,*  
215 *Codamol and Paracetamol.* Our results suggest that an increase in analgesics use

216 may be mediated by the development of musculoskeletal pain and damage to the  
217 nervous system. It is possible that the inflammatory state induced by obesity may  
218 also result in poorer musculoskeletal and nervous system health. However, more  
219 research is needed to disentangle the complex relationships between specific-tissue  
220 inflammation, pain and obesity.

221

222 Previous studies have described an increased incidence of disability among obese  
223 individuals.[23,24] Our results identified inferred causal associations between obesity  
224 and disability-related phenotypes such as *disability living allowance* and *long-*  
225 *standing illness or disability*. It is thus possible that the development of disabling  
226 conditions is mediated by increases in body fat, which result in poor musculoskeletal  
227 and nervous system health, which leads to a decrease in quality of life.

228

229 Despite extensive efforts in the investigation of obesity and lung function, the effects  
230 of obesity on the respiratory system have not been fully elucidated. Previous findings  
231 suggest that obesity may be associated with complex respiratory diseases such as  
232 chronic obstructive pulmonary disease (COPD) and its severity.[25–27] Our results  
233 revealed a causal association of obesity with risk of presenting *shortness of breath*  
234 and *whistling in the chest*, and increases in *FVC* and *FEV1*. Although our results did  
235 not identify a direct inferred causal relationship between obesity and COPD, traits  
236 such as *COPD onset* and *other obstructive pulmonary disease (ICD10)* were  
237 identified as causally associated with obesity. Also, previous studies have reported  
238 leukocyte accumulation in lung tissue in individuals with a chronic obstructive  
239 pulmonary disease, which in turn increases the expression of adhesion molecules in  
240 bronchial blood vessels.[28,29] Our results would suggest that obesity poses a

241 deteriorative effect on the respiratory system, which could contribute to the  
242 development of complex respiratory diseases. We speculate that this relationship  
243 could be mediated by the accumulation of adipose tissue and inflammation arising  
244 from an increase in *trunk fat mass*, which in turn could lead to physiological changes  
245 decreasing lung capacity and weakening the respiratory muscles. However, more  
246 research is needed to disentangle the intricate relationship between obesity,  
247 inflammation, lung function and disease.

248

249 Observational studies have reported an association between obesity and  
250 gastrointestinal diseases such as diverticular diseases and gastro-oesophageal  
251 reflux.[30] Consistently, our findings show that inferred causal associations in which  
252 obesity increases the risk for *diverticular diseases of the intestine (ICD10)* and *self-*  
253 *reported gastro-oesophageal reflux*.

254

255 Previous studies have sought to describe the extent to which obesity could be  
256 involved in the development of depression.[31–33] Some studies suggest a  
257 bidirectional relationship between obesity and depression,[32,33] while others report  
258 that anthropometric measurements such as BMI, fat mass and height are only risk  
259 factors for depression.[31] Although our results do not provide evidence for a direct  
260 inferred causal association between obesity and depression, phenotypes including  
261 *gaining weight during the worst period of depression* and *loneliness or isolation* were  
262 identified as causally associated with obesity. Also, previous research has suggested  
263 that white blood cell inflammatory biomarkers are associated with depressive  
264 symptoms.[34] Thus, our results are aligned with the hypothesis in which genetic  
265 obesity increases the risk for depression, perhaps as a result of a chronic pro-

266 inflammatory state. However, more research is required to understand the complex  
267 relationship between obesity, inflammation and psychiatric disorders.

268

269 Previous research has pointed out an association between ADHD and obesity.  
270 However, cause-effect links and the underpinning molecular mechanisms of this  
271 association remain unclear.[35,36] Recently, studies have suggested a bidirectional  
272 relationship between ADHD and obesity due to multiple confounding sources,[36,37]  
273 whereas others show a one-way causal relationship in which high BMI increases the  
274 risk for ADHD regardless of possible confounding factors.[38] In the present study,  
275 results show an inferred causal association in which obesity increases the risk of  
276 ADHD. However, to fully understand the effect of obesity on ADHD, additional  
277 research is required to unravel this puzzling relationship.

278

279 Our results are consistent with previous studies reporting that LCV is a meaningful  
280 tool to detect potential causal associations in underpowered phenotypes for which  
281 MR methods have not been able to determine genetic causation.[11–13] We  
282 suggest that the inferred causal relationships pointed out through LCV, could be  
283 used as a testable hypothesis for future epidemiological observational and genetic  
284 studies.

285

286 The main strengths of the LCV method used here include: (i) it is less prone to be  
287 biased due to horizontal pleiotropy; (ii) it is robust to sample overlap, (iii) it uses  
288 aggregated information across the entire genome, increasing statistical power and  
289 enabling analyses between pairs of phenotypes that would be considered  
290 “underpowered” for other statistical methods such as traditional Mendelian

291 randomisation (see O'Connor & Price[11] for details).[11–13] However, the LCV  
292 method is unable to detect bidirectional causality or confounding by environmental  
293 correlates of genotypes.[11,13] Therefore, care is recommended if these  
294 assumptions cannot be met.

295

296 Some limitations of the present study must be acknowledged. First, given that  
297 previous studies have highlighted ethnic differences in obesity[39] and our data was  
298 retrieved primarily from the UK Biobank, which predominantly consists of participants  
299 of European ancestry. Thus, the generalizability of our results is limited until it can be  
300 tested in other populations. Further, although our analyses included more than 1 400  
301 phenotypes, causal associations with other traits not tested here may exist. Related  
302 to this is the interpretability of some of the phenotypes used here such as *taking*  
303 *medication: Aspirin* which could be considered a proxy trait for pain. Unfortunately,  
304 other traits for which GWAS summary statistics are available lack such a  
305 straightforward proxy interpretation. Even though the LCV method uses genetic  
306 information aggregated across the entire genome, the GCP estimates are still tied to  
307 the statistical power of the samples and thus, the ability to infer causal associations  
308 for some phenotypes is limited, particularly for those with small sample sizes.

309

310 In summary, we assessed potential causal relationships between obesity and 1 498  
311 phenotypes and identified 110 traits with significant causal associations with obesity.  
312 Our findings uncovered the effect of obesity on leukocyte-related inflammation,  
313 which may incur in a chronic proinflammatory state, and on several components of  
314 metabolic syndrome. Further, we provide evidence for the impact of obesity on  
315 cardiovascular disease, poor health of the respiratory and musculoskeletal systems

316 and its potential damage to the nervous system. We observe an influence of obesity  
317 on gastrointestinal disorders, psychiatric phenotypes and the neurodevelopmental  
318 disorder *ADHD*. Also, we identified causal associations of obesity on bioelectrical  
319 impedances and physical disability. Altogether, our results confirm some previously  
320 reported associations and flag out some new testable hypotheses that could  
321 contribute to advance our understanding of the effects of obesity on metabolic  
322 inflammation in specific tissues and organs, which in turn may provide novel  
323 perspectives in the metabolic implications of obesity and the development of anti-  
324 inflammatory therapeutics.

325

## 326 **ACKNOWLEDGEMENTS**

327 A.I.C. is supported by a UQ Research Training Scholarship from The University of  
328 Queensland (UQ). M.E.R. thanks support of the NHMRC and Australian Research  
329 Council (ARC) through a Research Fellowship (GNT1102821). P.F.K. is supported  
330 by an Australian Government Research Training Program Scholarship from  
331 Queensland University of Technology (QUT).

332

## 333 **AUTHOR CONTRIBUTIONS**

334 M.E.R. and G.C.-P. conceived and directed the study. L.M.G.-M. performed the  
335 statistical and bioinformatics analyses, with support and input from A.I.C., P-F.K.,  
336 N.G.M., G.C.-P. and M.E.R. L.M.G.-M. wrote the first draft of paper and integrated  
337 input and feedback from all co-authors.

338

## 339 **ETHICS STATEMENT**

340 This study was approved by the Human Research Ethics Committee of the QIMR  
341 Berghofer Medical Research Institute.

342

### 343 **DISCLOSURE STATEMENT**

344 GC-P contributed to this study while employed at The University of Queensland. He  
345 is now an employee of 23andMe Inc. and he may hold stock or stock options. All  
346 other authors declare having no conflicts of interest.

347

## 348 REFERENCES

- 349 1. Panuganti KK, Nguyen M, Kshirsagar RK. Obesity. In: StatPearls [Internet].  
350 StatPearls Publishing; 2020.
- 351 2. Hruby A, Hu FB. The Epidemiology of Obesity: A Big Picture.  
352 Pharmacoeconomics. 2015 Jul;33(7):673–89.
- 353 3. Purnell JQ. Definitions, Classification, and Epidemiology of Obesity. In: Endotext  
354 [Internet]. MDText.com, Inc.; 2018.
- 355 4. Mitchell NS, Catenacci VA, Wyatt HR, Hill JO. Obesity: overview of an epidemic.  
356 Psychiatr Clin North Am. 2011 Dec;34(4):717–32.
- 357 5. Hurt RT, Kulisek C, Buchanan LA, McClave SA. The obesity epidemic:  
358 challenges, health initiatives, and implications for gastroenterologists.  
359 Gastroenterol Hepatol . 2010 Dec;6(12):780–92.
- 360 6. Ng M, Fleming T, Robinson M, Thomson B, Graetz N, Margono C, et al. Global,  
361 regional, and national prevalence of overweight and obesity in children and  
362 adults during 1980-2013: a systematic analysis for the Global Burden of Disease  
363 Study 2013. Lancet. 2014 Aug 30;384(9945):766–81.
- 364 7. Apovian CM. Obesity: definition, comorbidities, causes, and burden. Am J  
365 Manag Care [Internet]. 2016 Jun [cited 2020 Aug 23];22(7 Suppl). Available  
366 from: <https://pubmed.ncbi.nlm.nih.gov/27356115/>
- 367 8. De Lorenzo A, Soldati L, Sarlo F, Calvani M, Di Lorenzo N, Di Renzo L. New  
368 obesity classification criteria as a tool for bariatric surgery indication. World J  
369 Gastroenterol. 2016 Jan 14;22(2):681–703.
- 370 9. Goodarzi MO. Genetics of obesity: what genetic association studies have taught  
371 us about the biology of obesity and its complications. The Lancet Diabetes &  
372 Endocrinology. 2018 Mar;6(3):223–36.



- 373 10. Locke AE, Kahali B, Berndt SI, Justice AE, Pers TH, Day FR, et al. Genetic  
374 studies of body mass index yield new insights for obesity biology. *Nature*. 2015  
375 Feb 12;518(7538):197–206.
- 376 11. O'Connor LJ, Price AL. Distinguishing genetic correlation from causation across  
377 52 diseases and complex traits. *Nat Genet*. 2018 Oct 29;50(12):1728–34.
- 378 12. Garcia-Marin LM, Campos AI, Martin NG, Cuellar-Partida G, Renteria ME.  
379 Inference of causal relationships between sleep-related traits and 1,527  
380 phenotypes using genetic data. *medRxiv*. 2020 May 10;2020.05.06.20092643.
- 381 13. Haworth S, Kho PF, Holgerson PL, Hwang L-D, Timpson NJ, Rentería ME, et al.  
382 Assessment and visualization of phenome-wide causal relationships using  
383 genetic data: an application to dental caries and periodontitis. *Eur J Hum Genet*.  
384 2020 Oct 3;1–9.
- 385 14. Cuéllar-Partida G, Lundberg M, Kho PF, D'Urso S, Gutiérrez-Mondragón LF,  
386 Ngo TT, et al. Complex-Traits Genetics Virtual Lab: A community-driven web  
387 platform for post-GWAS analyses [Internet]. *bioRxiv*. 2019 [cited 2020 Jul 29]. p.  
388 518027. Available from:  
389 <https://www.biorxiv.org/content/10.1101/518027v4.abstract>
- 390 15. Lab N. GWAS Results [Internet]. UK Biobank - Neale Lab. 2018 [cited 2020 Jul  
391 29]. Available from: <http://www.nealelab.is/uk-biobank>
- 392 16. Leick M, Azcutia V, Newton G, Luscinskas FW. Leukocyte recruitment in  
393 inflammation: basic concepts and new mechanistic insights based on new  
394 models and microscopic imaging technologies. *Cell Tissue Res*. 2014  
395 Mar;355(3):647–56.
- 396 17. Langer HF, Chavakis T. Leukocyte-endothelial interactions in inflammation. *J*  
397 *Cell Mol Med*. 2009 Jul;13(7):1211–20.

- 398 18. Campia U, Tesauro M, Cardillo C. Human obesity and endothelium-dependent  
399 responsiveness. *Br J Pharmacol*. 2012 Feb;165(3):561–73.
- 400 19. Swarup S, Goyal A, Grigorova Y, Zeltser R. Metabolic Syndrome. In: StatPearls  
401 [Internet]. StatPearls Publishing; 2020.
- 402 20. Hoffman M, Blum A, Baruch R, Kaplan E, Benjamin M. Leukocytes and coronary  
403 heart disease. *Atherosclerosis*. 2004 Jan;172(1):1–6.
- 404 21. Kim JH, Lim S, Park KS, Jang HC, Choi SH. Total and differential WBC counts  
405 are related with coronary artery atherosclerosis and increase the risk for  
406 cardiovascular disease in Koreans. *PLoS One*. 2017 Jul 28;12(7):e0180332.
- 407 22. Hozumi J, Sumitani M, Matsubayashi Y, Abe H, Oshima Y, Chikuda H, et al.  
408 Relationship between Neuropathic Pain and Obesity. *Pain Res Manag*. 2016  
409 Mar 29;2016:2487924.
- 410 23. Anandacoomarasamy A, Caterson I, Sambrook P, Fransen M, March L. The  
411 impact of obesity on the musculoskeletal system. *Int J Obes*. 2008  
412 Feb;32(2):211–22.
- 413 24. Queirós FC, Wehby GL, Halpern CT. Developmental disabilities and  
414 socioeconomic outcomes in young adulthood. *Public Health Rep*. 2015  
415 May;130(3):213–21.
- 416 25. Mafort TT, Rufino R, Costa CH, Lopes AJ. Obesity: systemic and pulmonary  
417 complications, biochemical abnormalities, and impairment of lung function.  
418 *Multidiscip Respir Med*. 2016 Jul 12;11:28.
- 419 26. Zammit C, Liddicoat H, Moonsie I, Makker H. Obesity and respiratory diseases.  
420 *Int J Gen Med*. 2010 Oct 20;3:335–43.
- 421 27. Dixon AE, Peters U. The effect of obesity on lung function. *Expert Rev Respir*  
422 *Med*. 2018 Sep;12(9):755–67.

- 423 28. Koo H-K, Kang HK, Song P, Park HK, Lee S-S, Jung H. Systemic White Blood  
424 Cell Count as a Biomarker Associated with Severity of Chronic Obstructive Lung  
425 Disease. *Tuberc Respir Dis* . 2017 Jul;80(3):304–10.
- 426 29. Davis BB, Shen Y-H, Tancredi DJ, Flores V, Davis RP, Pinkerton KE.  
427 Leukocytes are recruited through the bronchial circulation to the lung in a  
428 spontaneously hypertensive rat model of COPD. *PLoS One*. 2012 Mar  
429 21;7(3):e33304.
- 430 30. Camilleri M, Malhi H, Acosta A. Gastrointestinal Complications of Obesity.  
431 *Gastroenterology*. 2017 May;152(7):1656–70.
- 432 31. Speed MS, Jepsen OH, Børghlum AD, Speed D, Østergaard SD. Investigating the  
433 association between body fat and depression via Mendelian randomization.  
434 *Transl Psychiatry*. 2019 Aug 5;9(1):184.
- 435 32. Chauvet-Gelinier J-C, Roussot A, Cottenet J, Brindisi M-C, Petit J-M, Bonin B, et  
436 al. Depression and obesity, data from a national administrative database study:  
437 Geographic evidence for an epidemiological overlap. *PLoS One*. 2019 Jan  
438 8;14(1):e0210507.
- 439 33. Mannan M, Mamun A, Doi S, Clavarino A. Prospective Associations between  
440 Depression and Obesity for Adolescent Males and Females- A Systematic  
441 Review and Meta-Analysis of Longitudinal Studies. *PLoS One*. 2016 Jun  
442 10;11(6):e0157240.
- 443 34. Beydoun MA, Beydoun HA, Dore GA, Canas J-A, Fanelli-Kuczmariski MT, Evans  
444 MK, et al. White blood cell inflammatory markers are associated with depressive  
445 symptoms in a longitudinal study of urban adults. *Transl Psychiatry*. 2016 Sep  
446 20;6(9):e895.
- 447 35. Cortese S. The Association between ADHD and Obesity: Intriguing,

- 448           Progressively More Investigated, but Still Puzzling. *Brain Sci* [Internet]. 2019 Sep  
449           27;9(10). Available from: <http://dx.doi.org/10.3390/brainsci9100256>
- 450   36. Cortese S, Tessari L. Attention-Deficit/Hyperactivity Disorder (ADHD) and  
451           Obesity: Update 2016. *Curr Psychiatry Rep*. 2017 Jan;19(1):4.
- 452   37. Liu C, Schoeler T, Davies NM, Peyre H, Lim K-X, Barker E, et al. Are there  
453           causal relationships between ADHD and BMI? Evidence from multiple  
454           genetically informed designs. *medRxiv*. 2020 Jul 30;2020.04.16.20067918.
- 455   38. Martins-Silva T, dos Santos Vaz J, Hutz MH, Salatino-Oliveira A, Genro JP,  
456           Hartwig FP, et al. Assessing causality in the association between attention-  
457           deficit/hyperactivity disorder and obesity: a Mendelian randomization study. *Int J*  
458           *Obes*. 2019 Apr 18;43(12):2500–8.
- 459   39. Higgins V, Nazroo J, Brown M. Pathways to ethnic differences in obesity: The  
460           role of migration, culture and socio-economic position in the UK. *SSM Popul*  
461           *Health*. 2019 Apr;7:100394.

462 **FIGURES**

463 **Figure 1. Causal associations for obesity**

464 Causal architecture plots showing the latent causal variable exposome-wide analysis results.  
465 Each dot represents a trait with a significant genetic correlation with obesity. The x-axis  
466 shows the GCP estimate whilst the y-axis shows the genetic causality proportion (GCP)  
467 absolute Z-score (as a measure of statistical significance). The statistical significance  
468 threshold (FDR<5%) is represented by the red dashed lines while the division for traits  
469 causally influencing obesity (on the left) and traits causally influenced by obesity (on the  
470 right) is represented by the grey dashed lines. Results are shown separately for traits with a  
471 positive genetic correlation with obesity (a) and with a negative genetic correlation with  
472 obesity (b).

473 **TABLES**

474

**Table 1.** LCV method summary results for obesity.

| <b>Category</b>             | <b>Number of potential causal relationships</b> | <b>Number of traits influenced by obesity</b> | <b>Number of traits that influence obesity</b> |
|-----------------------------|-------------------------------------------------|-----------------------------------------------|------------------------------------------------|
| Cardiovascular              | 26                                              | 26                                            | 0                                              |
| Anthropometric measurements | 22                                              | 22                                            | 0                                              |
| Musculoskeletal system      | 9                                               | 8                                             | 1                                              |
| Behavioural / Lifestyle     | 9                                               | 9                                             | 0                                              |
| Respiratory                 | 6                                               | 6                                             | 0                                              |
| Bioelectric impedances      | 5                                               | 5                                             | 0                                              |
| Psychiatric                 | 4                                               | 4                                             | 0                                              |
| Nervous system              | 4                                               | 4                                             | 0                                              |
| Disabilities                | 4                                               | 4                                             | 0                                              |
| Gastrointestinal system     | 3                                               | 3                                             | 0                                              |
| Use of analgesics           | 3                                               | 3                                             | 0                                              |
| Metabolic disease           | 2                                               | 2                                             | 0                                              |
| Inflammatory response       | 1                                               | 1                                             | 0                                              |
| Neurodevelopmental          | 1                                               | 1                                             | 0                                              |
| Mouth problems              | 1                                               | 1                                             | 0                                              |
| Others                      | 9                                               | 9                                             | 0                                              |

The number of potential causal relationships with obesity corresponds to those results with FDR < 5%. Obesity was tested against a panel of 1 498 potentially heritable traits in the CTG-VL catalogue.

475

476

**Table 2.** Obesity is causally associated with cardiovascular, anthropometric, musculoskeletal, behavioural or lifestyle, respiratory, psychiatric, nervous system, gastrointestinal, metabolic, inflammatory response and neurodevelopmental phenotypes.

| Category                   | Trait                                                    | rG    | GCP  | GCP pval |
|----------------------------|----------------------------------------------------------|-------|------|----------|
| Cardiovascular             | Self-reported hypertension                               | 0.42  | 0.94 | 7.71E-66 |
| Cardiovascular             | Diastolic blood pressure                                 | 0.27  | 0.85 | 4.97E-14 |
| Cardiovascular             | Chronic ischaemic heart disease (ICD10)                  | 0.41  | 0.72 | 5.94E-04 |
| Cardiovascular             | Major coronary heart disease event                       | 0.49  | 0.74 | 1.58E-04 |
| Cardiovascular             | Myocardial infarction                                    | 0.49  | 0.70 | 1.56E-03 |
| Cardiovascular             | HDL cholesterol                                          | -0.32 | 0.68 | 1.68E-02 |
| Anthropometric measurement | Height                                                   | -0.22 | 0.72 | 1.22E-04 |
| Anthropometric measurement | Waist circumference                                      | 0.71  | 0.66 | 5.02E-03 |
| Anthropometric measurement | Hip circumference                                        | 0.64  | 0.63 | 9.49E-03 |
| Musculoskeletal system     | Self-reported osteoarthritis                             | 0.71  | 0.91 | 1.20E-24 |
| Musculoskeletal system     | Gonarthrosis (ICD10)                                     | 0.57  | 0.88 | 7.16E-18 |
| Musculoskeletal system     | Knee pain in the last month                              | 0.70  | 0.87 | 5.81E-14 |
| Musculoskeletal system     | Arthrosis                                                | 0.47  | 0.83 | 1.29E-11 |
| Musculoskeletal system     | Hip pain in the last month                               | 0.55  | 0.79 | 2.44E-07 |
| Behavioural / Lifestyle    | Loneliness / Isolation                                   | 0.48  | 0.93 | 6.11E-52 |
| Behavioural / Lifestyle    | Previous smoker                                          | 0.32  | 0.72 | 3.11E-05 |
| Behavioural / Lifestyle    | Previous alcohol drinker                                 | 0.44  | 0.73 | 1.87E-04 |
| Behavioural / Lifestyle    | Age first had sexual intercourse                         | -0.50 | 0.77 | 2.16E-06 |
| Respiratory                | Forced vital capacity (FVC)                              | -0.37 | 0.89 | 1.48E-03 |
| Respiratory                | Forced expiratory volume in 1 second (FEV1)              | -0.27 | 0.83 | 3.69E-12 |
| Respiratory                | Shortness of breath walking on level ground              | 0.76  | 0.85 | 2.16E-06 |
| Respiratory                | Wheeze or whistling in the chest in the last year        | 0.46  | 0.69 | 8.09E-04 |
| Psychiatric                | Ever had period of extreme irritability                  | 0.36  | 0.85 | 5.67E-13 |
| Psychiatric                | Manifestations of mania or irritability                  | 0.43  | 0.68 | 1.77E-03 |
| Psychiatric                | Gained weight during worst episode of depression         | 0.70  | 0.63 | 1.82E-02 |
| Nervous system             | Diseases of the nervous system                           | 0.48  | 0.76 | 8.77E-06 |
| Nervous system             | Mononeuropathies and upper limb (ICD10)                  | 0.39  | 0.72 | 1.37E-04 |
| Nervous system             | Carpal tunnel syndrome                                   | 0.43  | 0.68 | 1.27E-03 |
| Nervous system             | Nerve, nerve root and plexus disorders                   | 0.51  | 0.66 | 3.70E-03 |
| Gastrointestinal system    | Diverticular disease of intestine (ICD10)                | 0.51  | 0.67 | 3.43E-03 |
| Gastrointestinal system    | Self-reported gastro-oesophageal reflux / gastric reflux | 0.50  | 0.62 | 1.22E-02 |
| Metabolic disease          | Diabetes diagnosed by a doctor                           | 0.60  | 0.75 | 3.49E-04 |
| Inflammatory response      | Leukocyte count                                          | 0.20  | 0.66 | 2.00E-03 |
| Neurodevelopmental         | Attention-Deficit - Hyperactivity Disorder (ADHD)        | 0.85  | 0.64 | 1.84E-02 |

This table shows some traits with a significant (FDR<5%) strong genetic causal proportion (GCP > 0.60) for obesity. The number of potential causal relationships corresponds to those results with FDR < 5%. Due to space restrictions, results for all nominally significant genetic correlations for obesity are reported in **Supplementary File 1**.

477

478 **SUPPLEMENTARY FILES**

479 **Supplementary File 1.** LCV output for obesity.



**a**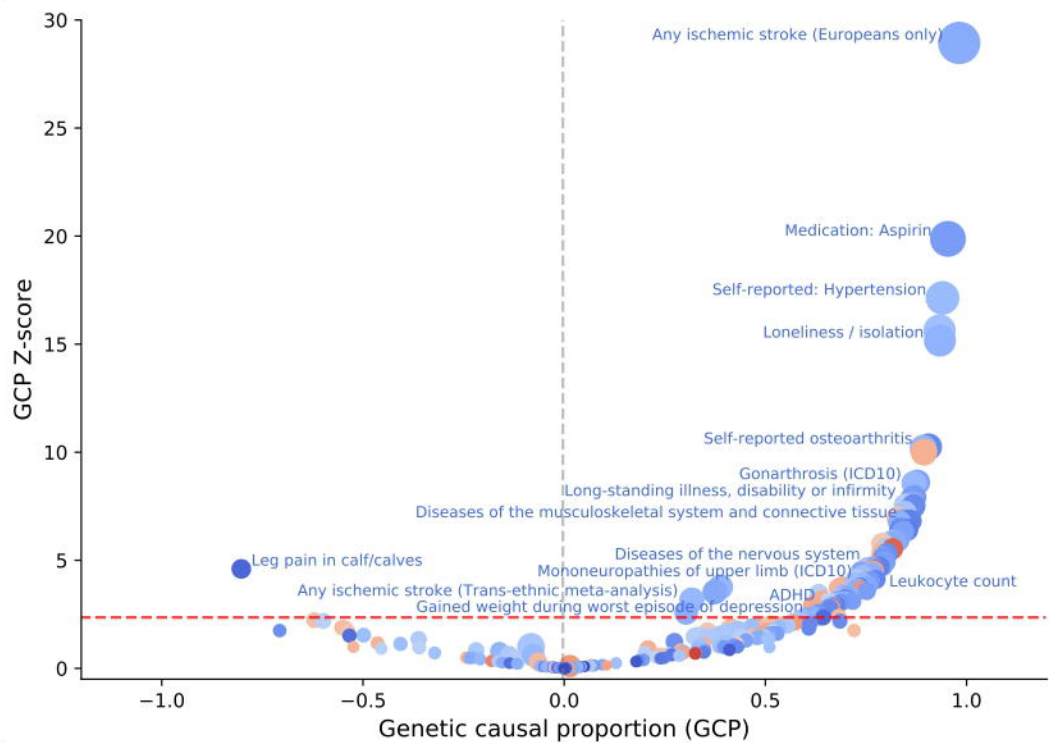**b**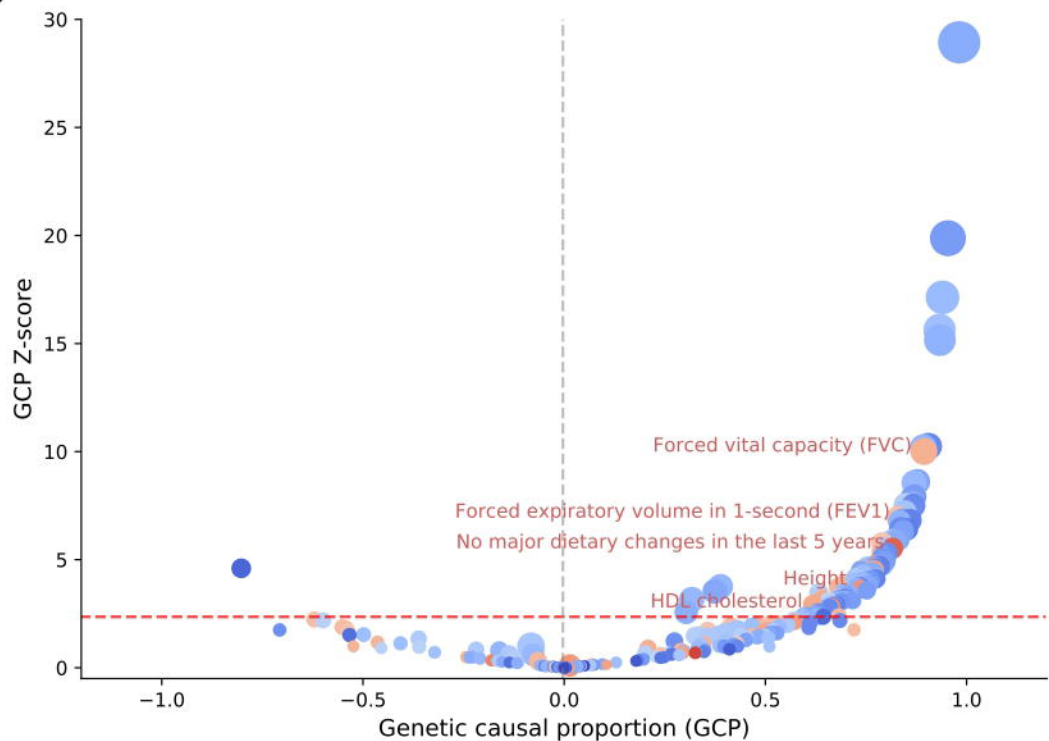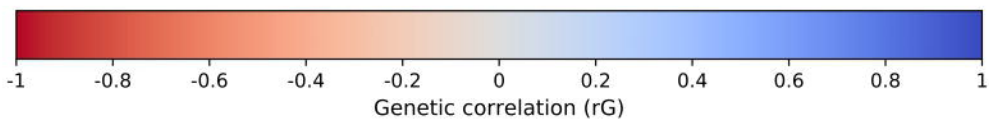

Source: https://www.medrxiv.org/content/10.1101/2020.10.20.20216598v1.full.pdf
